# Supplementary material for: Anti-SARS-CoV-2 and cytotoxic activity of two marine alkaloids from green alga Caulerpa cylindracea Sonder in the Dardanelles
Source: Royal Society of Chemistry journal article supplement (doi:10.1039/d2ra03358e), 2022-01-01
Supplement: d2ra03358e1.pdf [file d2ra03358e1.pdf]

**Anti-SARS-CoV-2 and Cytotoxic Activity of Two Marine Alkaloids from Green Alga *Caulerpa cylindracea* Sonder in the Dardanelles**

Ebru Erol,<sup>a</sup> Muge Didem Orhan,<sup>b</sup> Timucin Avsar,<sup>b,c</sup> Atilla Akdemir,<sup>d</sup> Emine Sukran Okudan,<sup>d</sup> Gulbahar Ozge Alim Toraman<sup>e</sup> and Gulacti Topcu<sup>\*e,f</sup>

<sup>a</sup>Dept. of Analytical Chemistry, Faculty of Pharmacy, Bezmialem Vakif University, Istanbul, Turkey.

<sup>b</sup>Bahcesehir University, Health Sciences Institute, Neuroscience Laboratory, Istanbul, Turkey.

<sup>c</sup>Bahcesehir University, School of Medicine, Department of Medical Biology, Istanbul, Turkey.

<sup>d</sup>Computer-Aided Drug Discovery Lab., Dept. of Pharmacology, Faculty of Pharmacy, Bezmialem Vakif University, Istanbul, Turkey.

<sup>e</sup>Faculty of Aquatic Sciences and Fisheries, Akdeniz University, Antalya, Turkey.

<sup>f</sup>Dept. of Pharmacognosy, Faculty of Pharmacy, Bezmialem Vakif University, Istanbul, Turkey.

|             | <b>Supporting data</b>                                                                                                                       | <b>Page</b> |
|-------------|----------------------------------------------------------------------------------------------------------------------------------------------|-------------|
| <b>S1:</b>  | <sup>1</sup> H NMR of compound <b>1</b> (500 Hz, CDCl <sub>3</sub> ) .....                                                                   | 2           |
| <b>S2:</b>  | <sup>1</sup> H NMR of compound <b>1</b> zoom in 6.9-9.3 ppm (500 Hz, CDCl <sub>3</sub> ) .....                                               | 3           |
| <b>S3:</b>  | <sup>13</sup> C NMR of compound <b>1</b> (125 Hz, CDCl <sub>3</sub> ) .....                                                                  | 4           |
| <b>S4:</b>  | HSQC of compound <b>1</b> .....                                                                                                              | 5           |
| <b>S5:</b>  | HMBC of compound <b>1</b> .....                                                                                                              | 6           |
| <b>S6:</b>  | COSY of compound <b>1</b> .....                                                                                                              | 7           |
| <b>S7:</b>  | HRMS of compound <b>1</b> .....                                                                                                              | 8           |
| <b>S8:</b>  | <sup>1</sup> H NMR of compound <b>2</b> (500 Hz, MeOD) .....                                                                                 | 9           |
| <b>S9:</b>  | <sup>1</sup> H NMR of compound <b>2</b> zoom in 6.75-8.15 ppm (500 Hz, MeOD) .....                                                           | 10          |
| <b>S10:</b> | <sup>13</sup> C NMR of compound <b>2</b> (125 Hz, MeOD) .....                                                                                | 11          |
| <b>S11:</b> | HSQC of compound <b>2</b> .....                                                                                                              | 12          |
| <b>S12:</b> | HMBC of compound <b>2</b> .....                                                                                                              | 13          |
| <b>S13:</b> | COSY of compound <b>2</b> .....                                                                                                              | 14          |
| <b>S14:</b> | HRMS of compound <b>2</b> .....                                                                                                              | 15          |
| <b>S15:</b> | <sup>1</sup> H NMR of compound <b>3</b> (500 Hz, CDCl <sub>3</sub> ) .....                                                                   | 16          |
| <b>S16:</b> | <sup>13</sup> C NMR of compound <b>3</b> (125 Hz, CDCl <sub>3</sub> ) .....                                                                  | 17          |
| <b>S17:</b> | HRMS of compound <b>4</b> .....                                                                                                              | 18          |
| <b>S18:</b> | Main protease activity of caulerpin ( <b>1</b> ) and mono methyl caulerpinate ( <b>2</b> ) at different concentration                        | 19          |
| <b>S19:</b> | Spike and ACE-2 binding activity with of caulerpin ( <b>1</b> ) and mono methyl caulerpinate ( <b>2</b> ) treated at different concentration | 20          |
| <b>S20:</b> | Evaluation of the cell viability of the caulerpin and mono methyl caulerpinate against MDA-MB-231 and MCF-7 cell lines by MTT assay          | 21          |

S1: <sup>1</sup>H NMR of compound 1 (500 Hz, CDCl<sub>3</sub>)

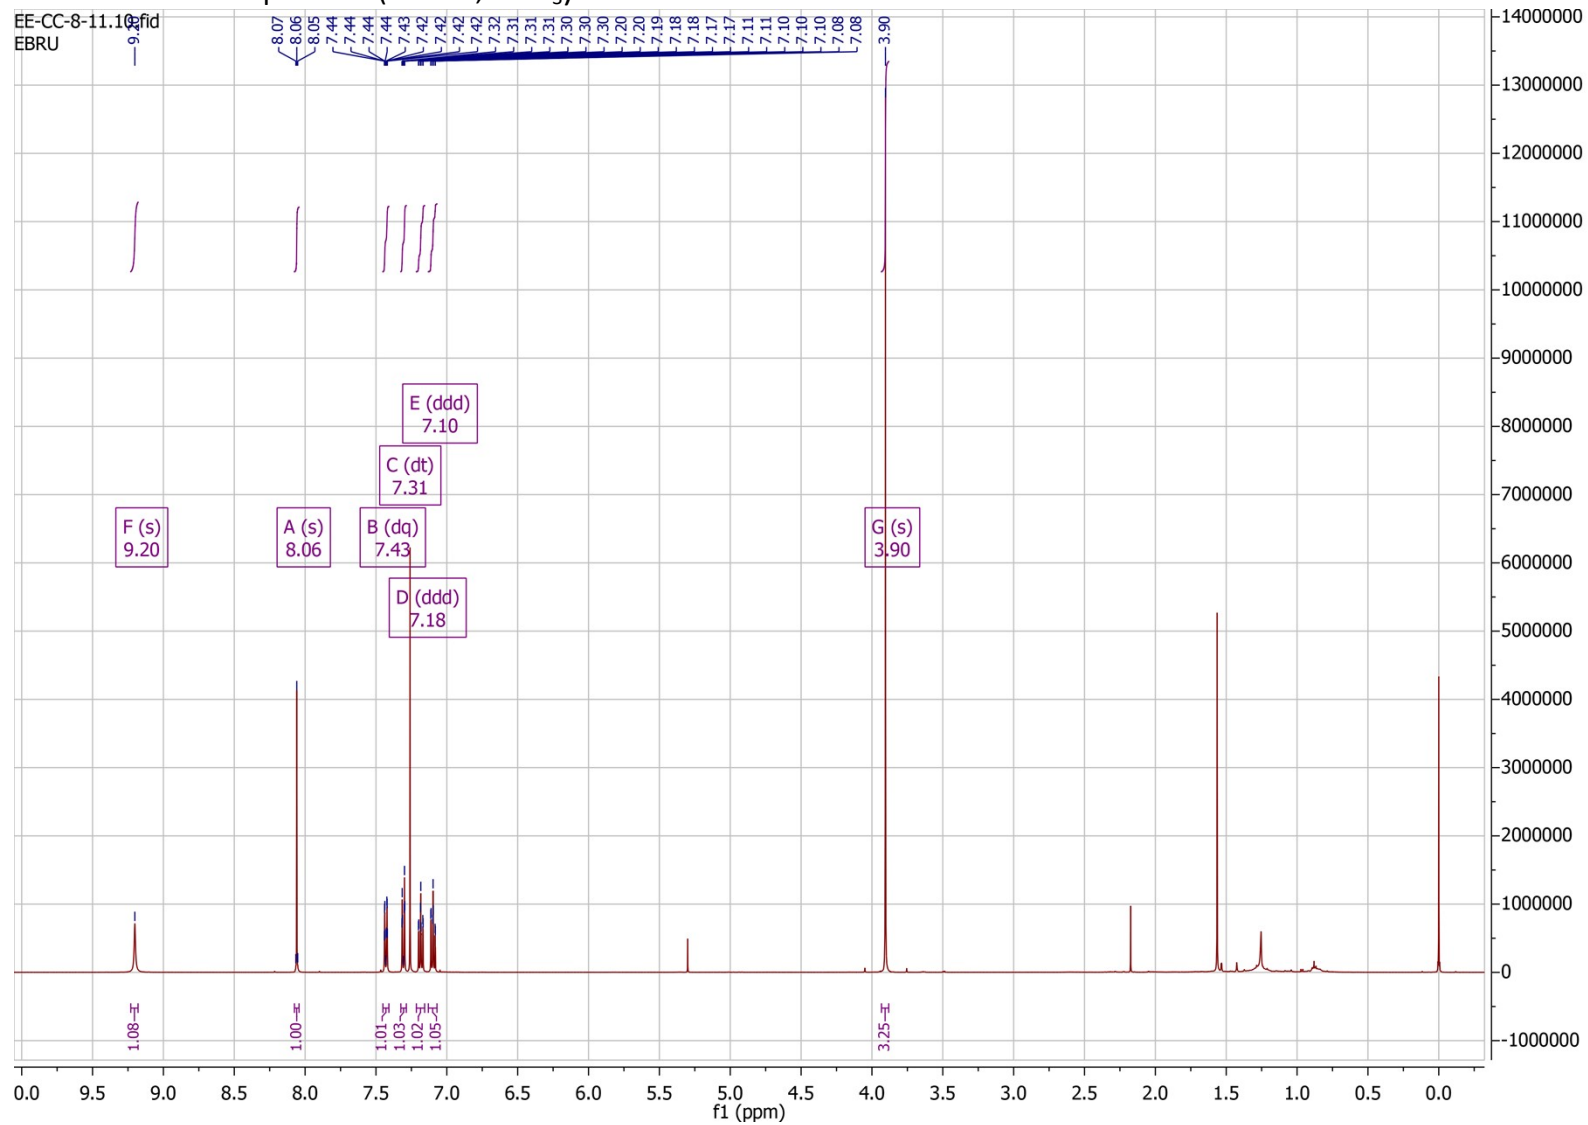

S2: <sup>1</sup>H NMR of compound 1 zoom in 6.9-9.3 ppm (500 Hz, CDCl<sub>3</sub>)

EE-CC-8-11.10.fid  
EBRU

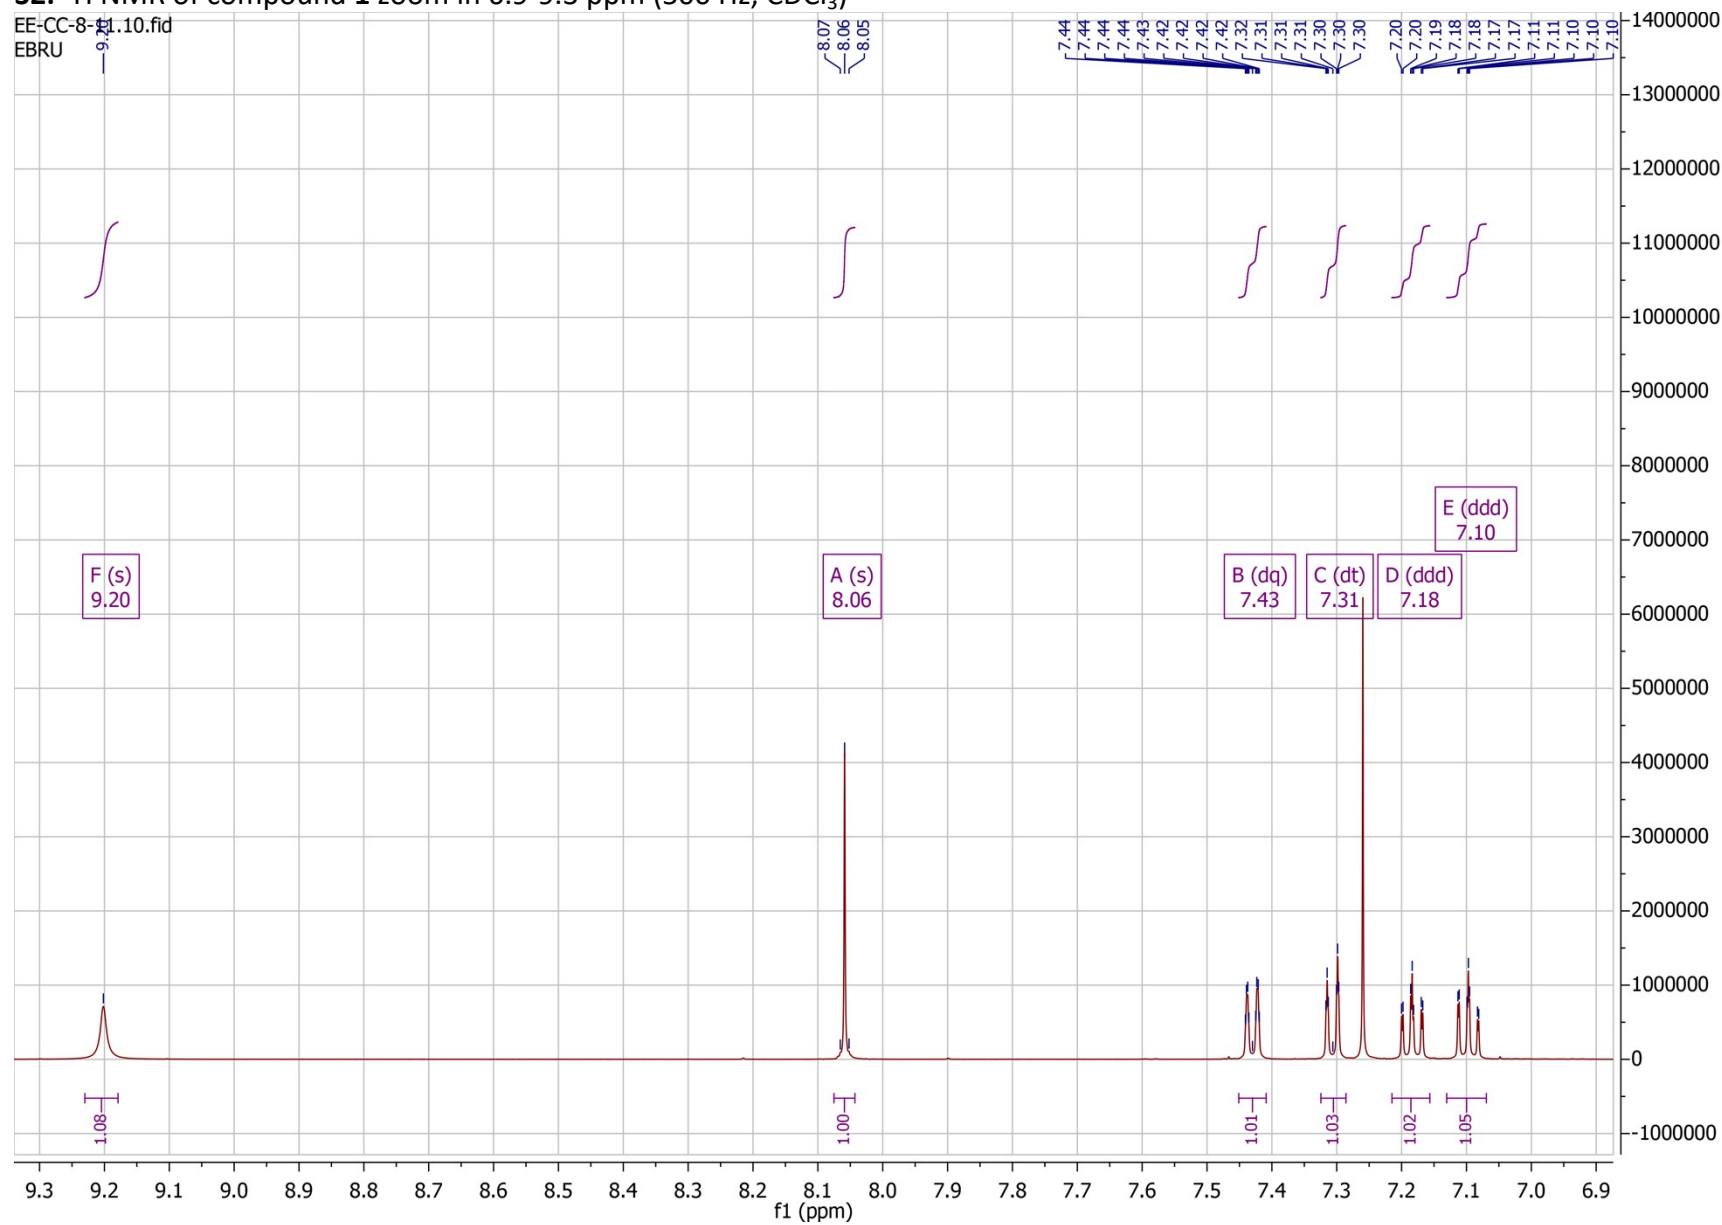

**S3:**  $^{13}\text{C}$  NMR of compound **1** (125 Hz,  $\text{CDCl}_3$ )

EE-CC-8-11.13.fid  
EBRU

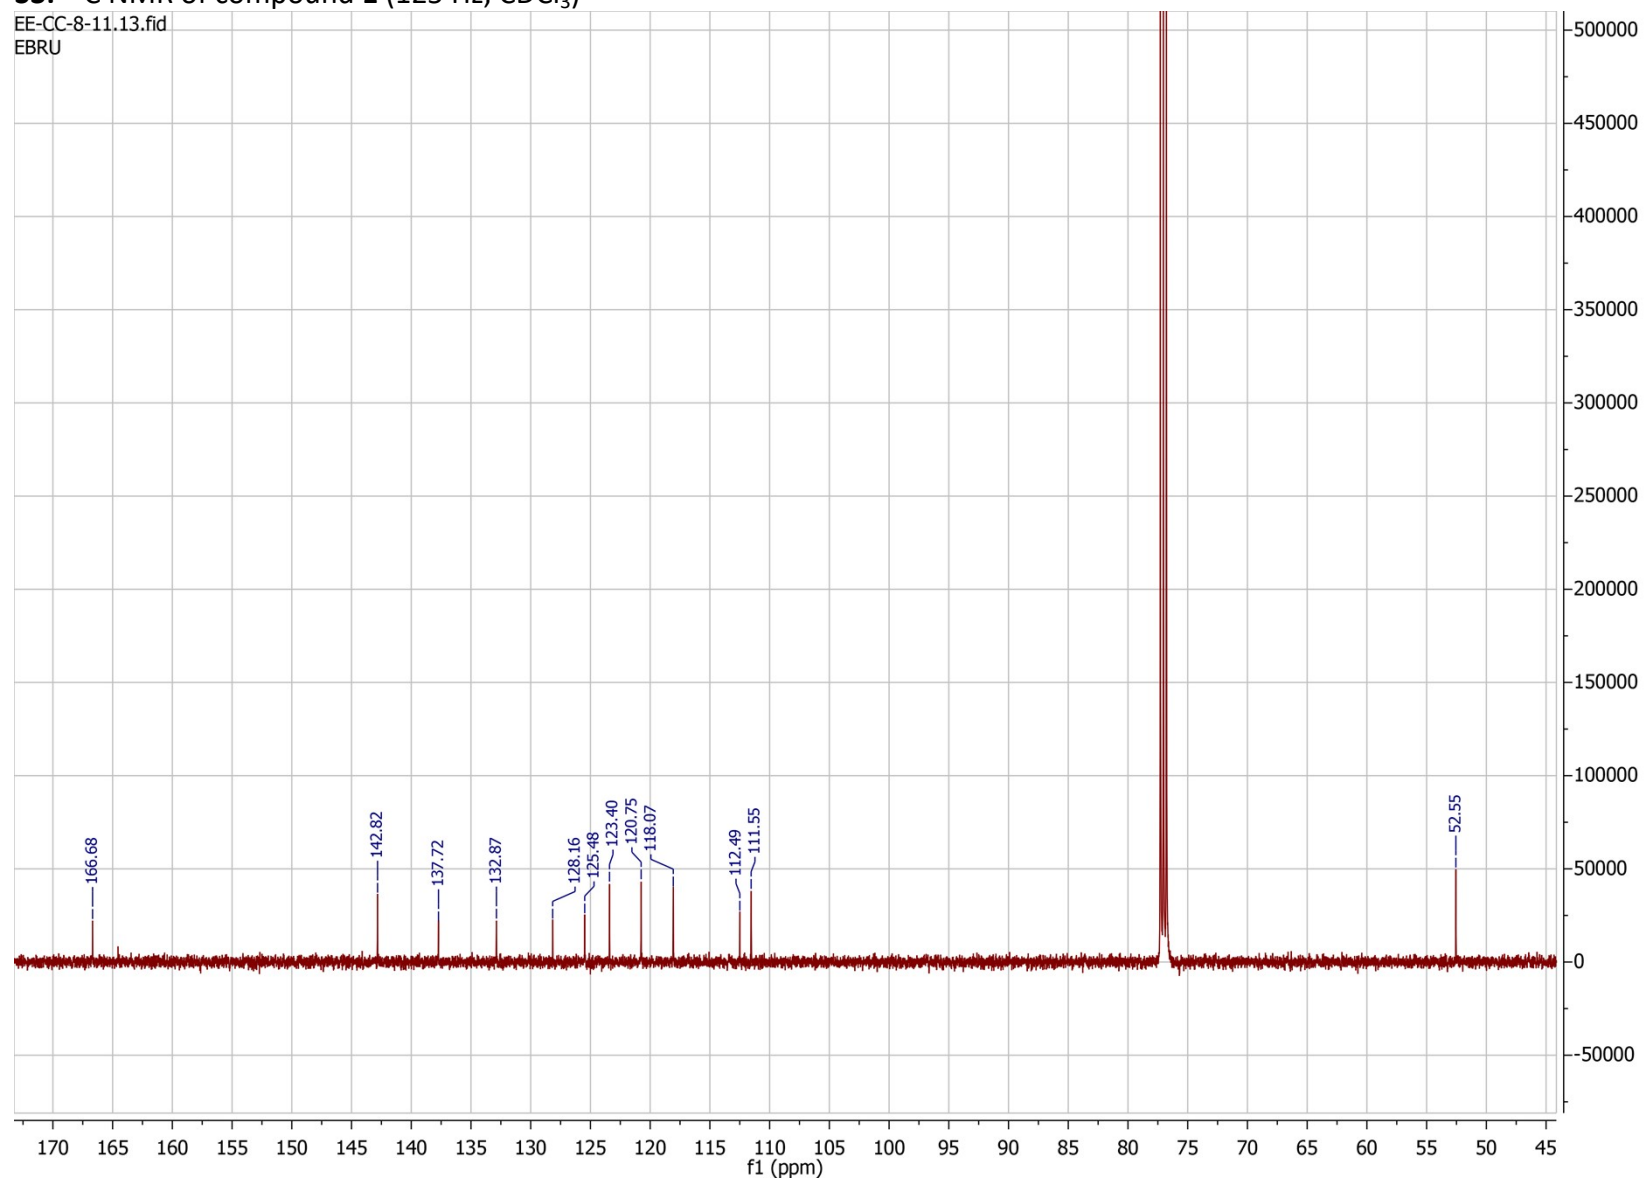

S4: HSQC of compound 1

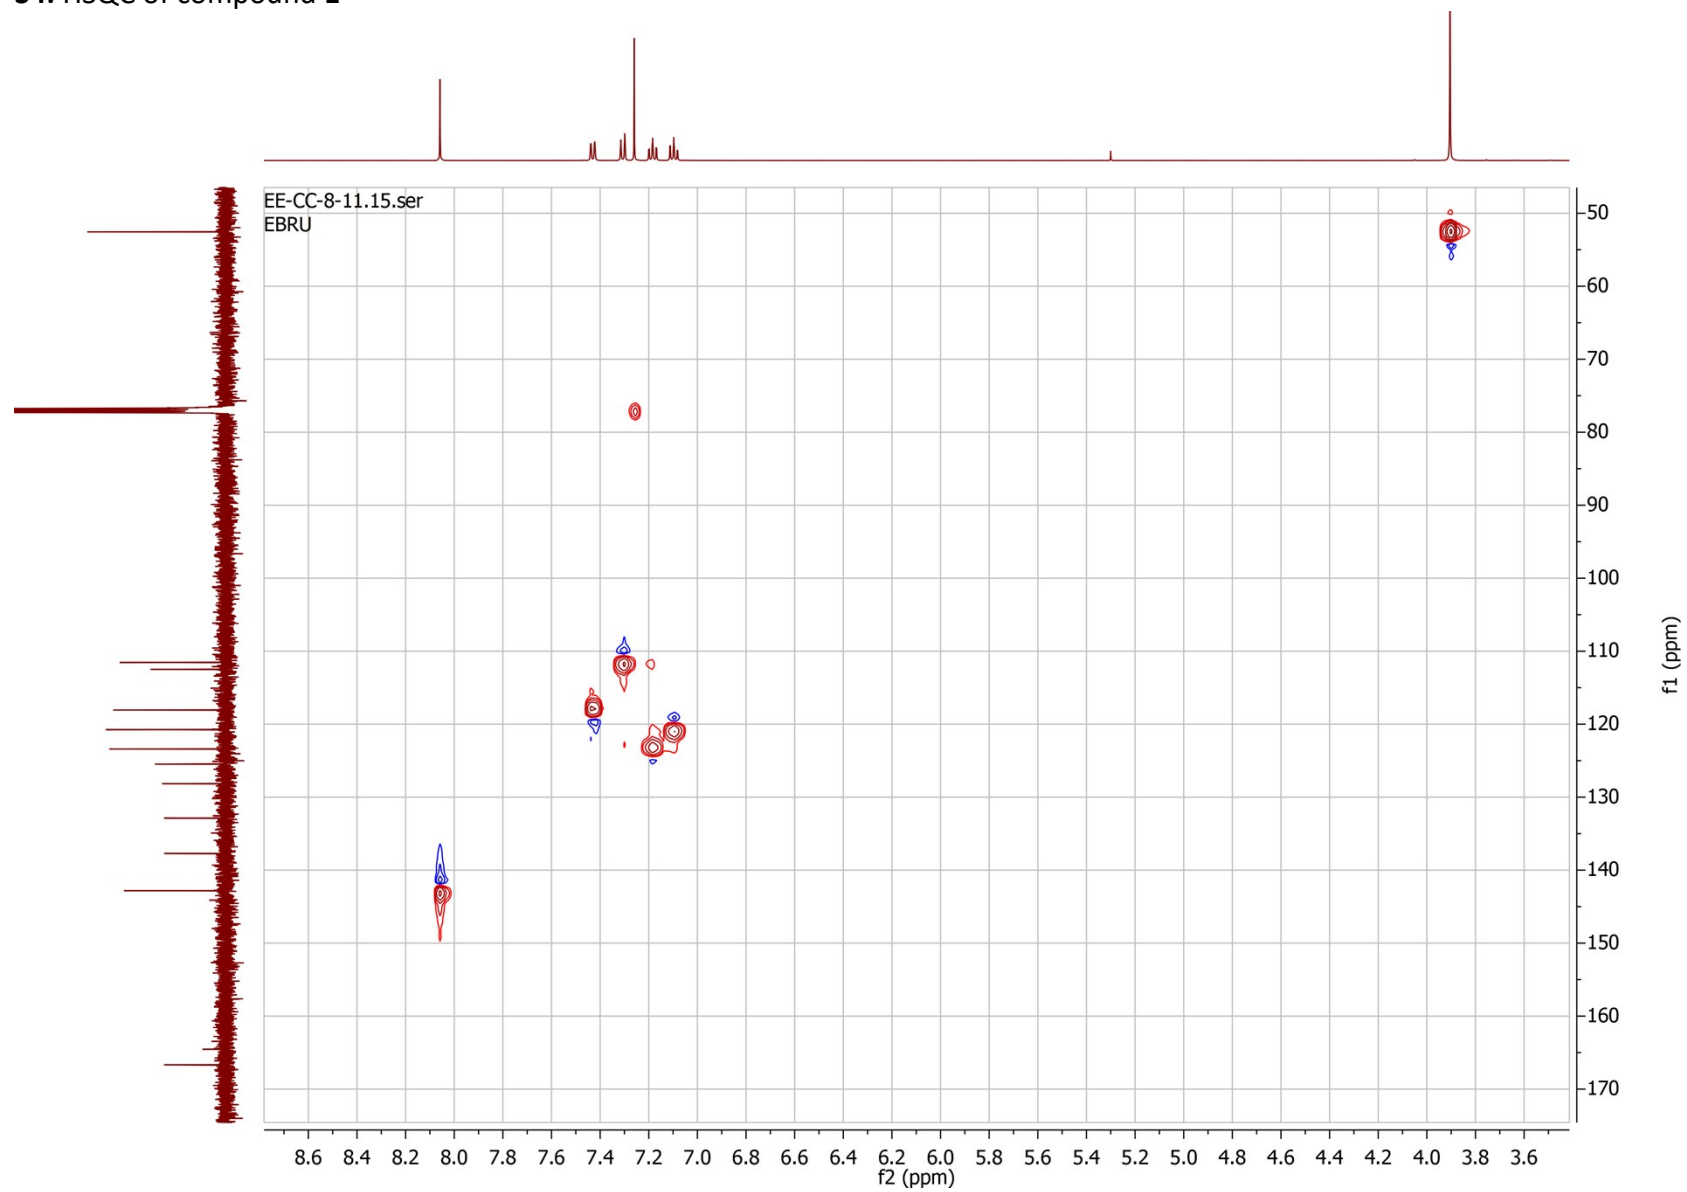

S5: HMBC of compound 1

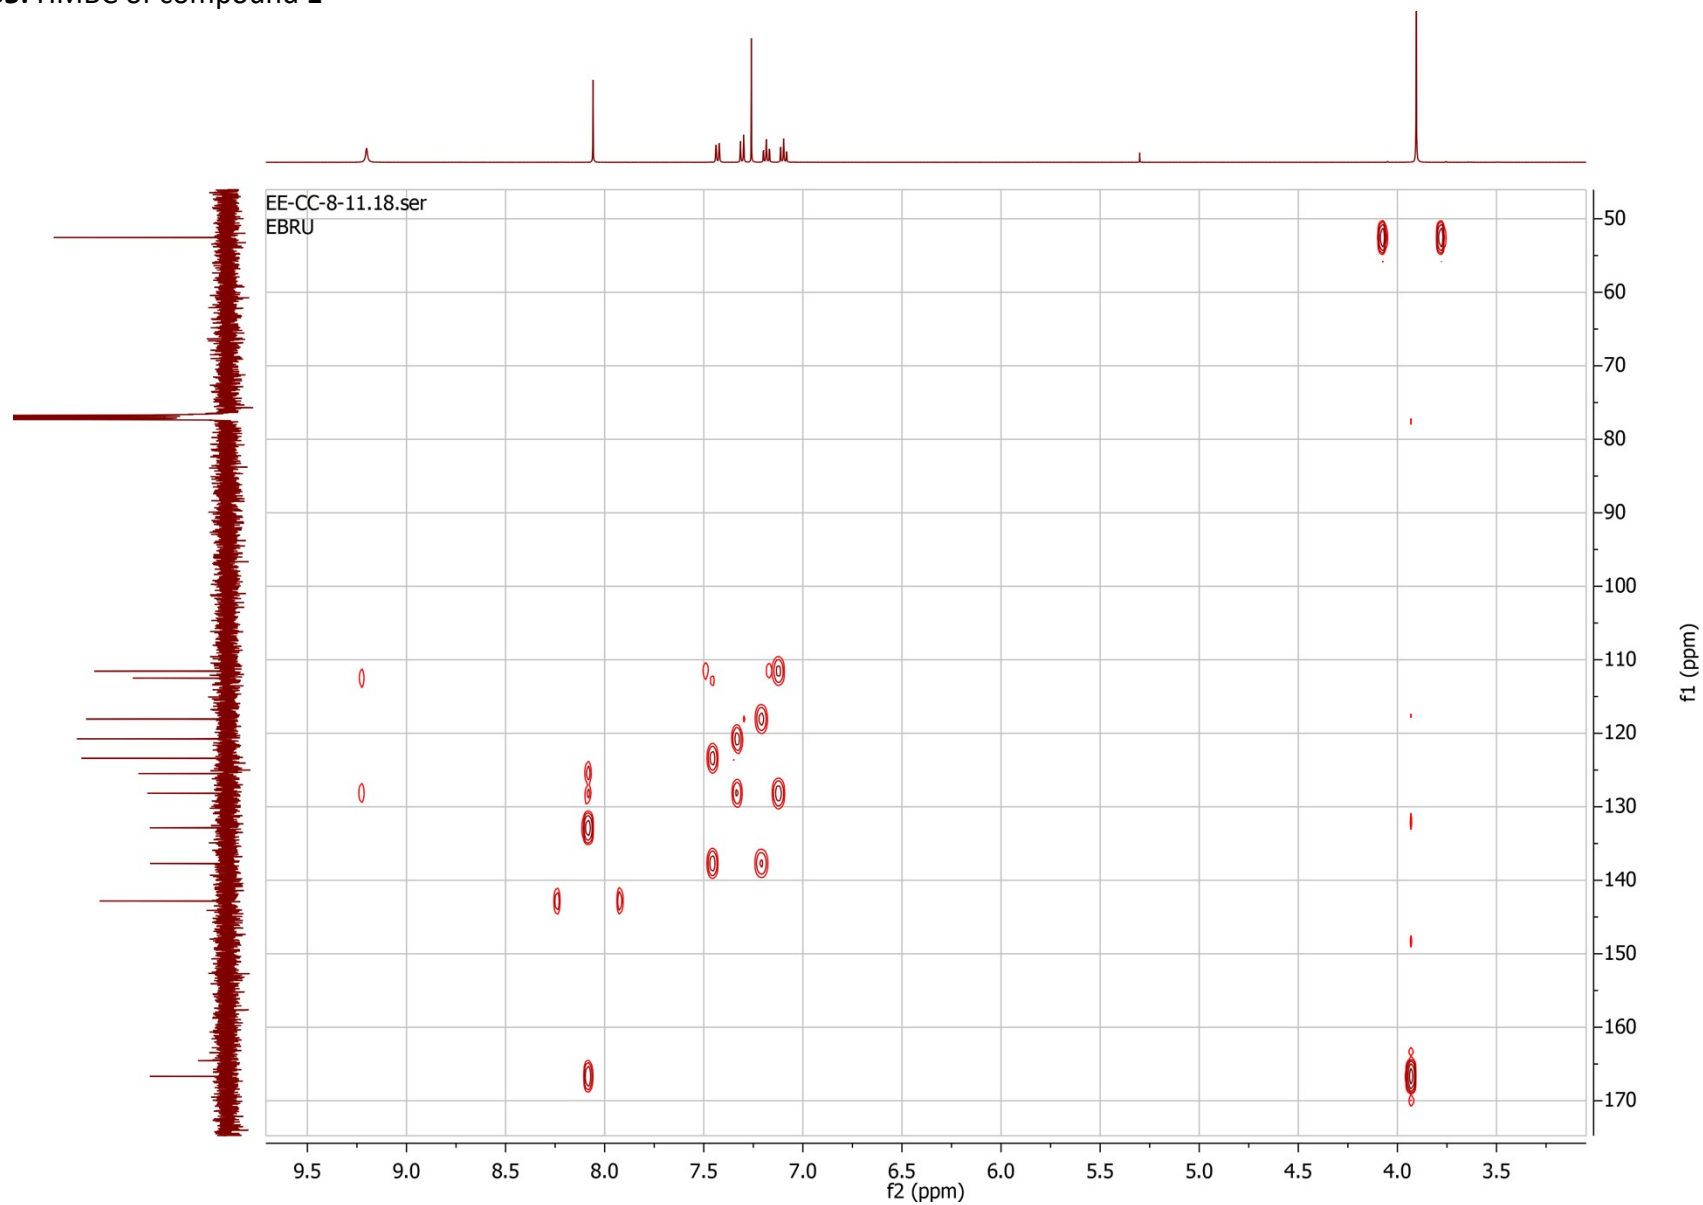

S6: COSY of compound 1

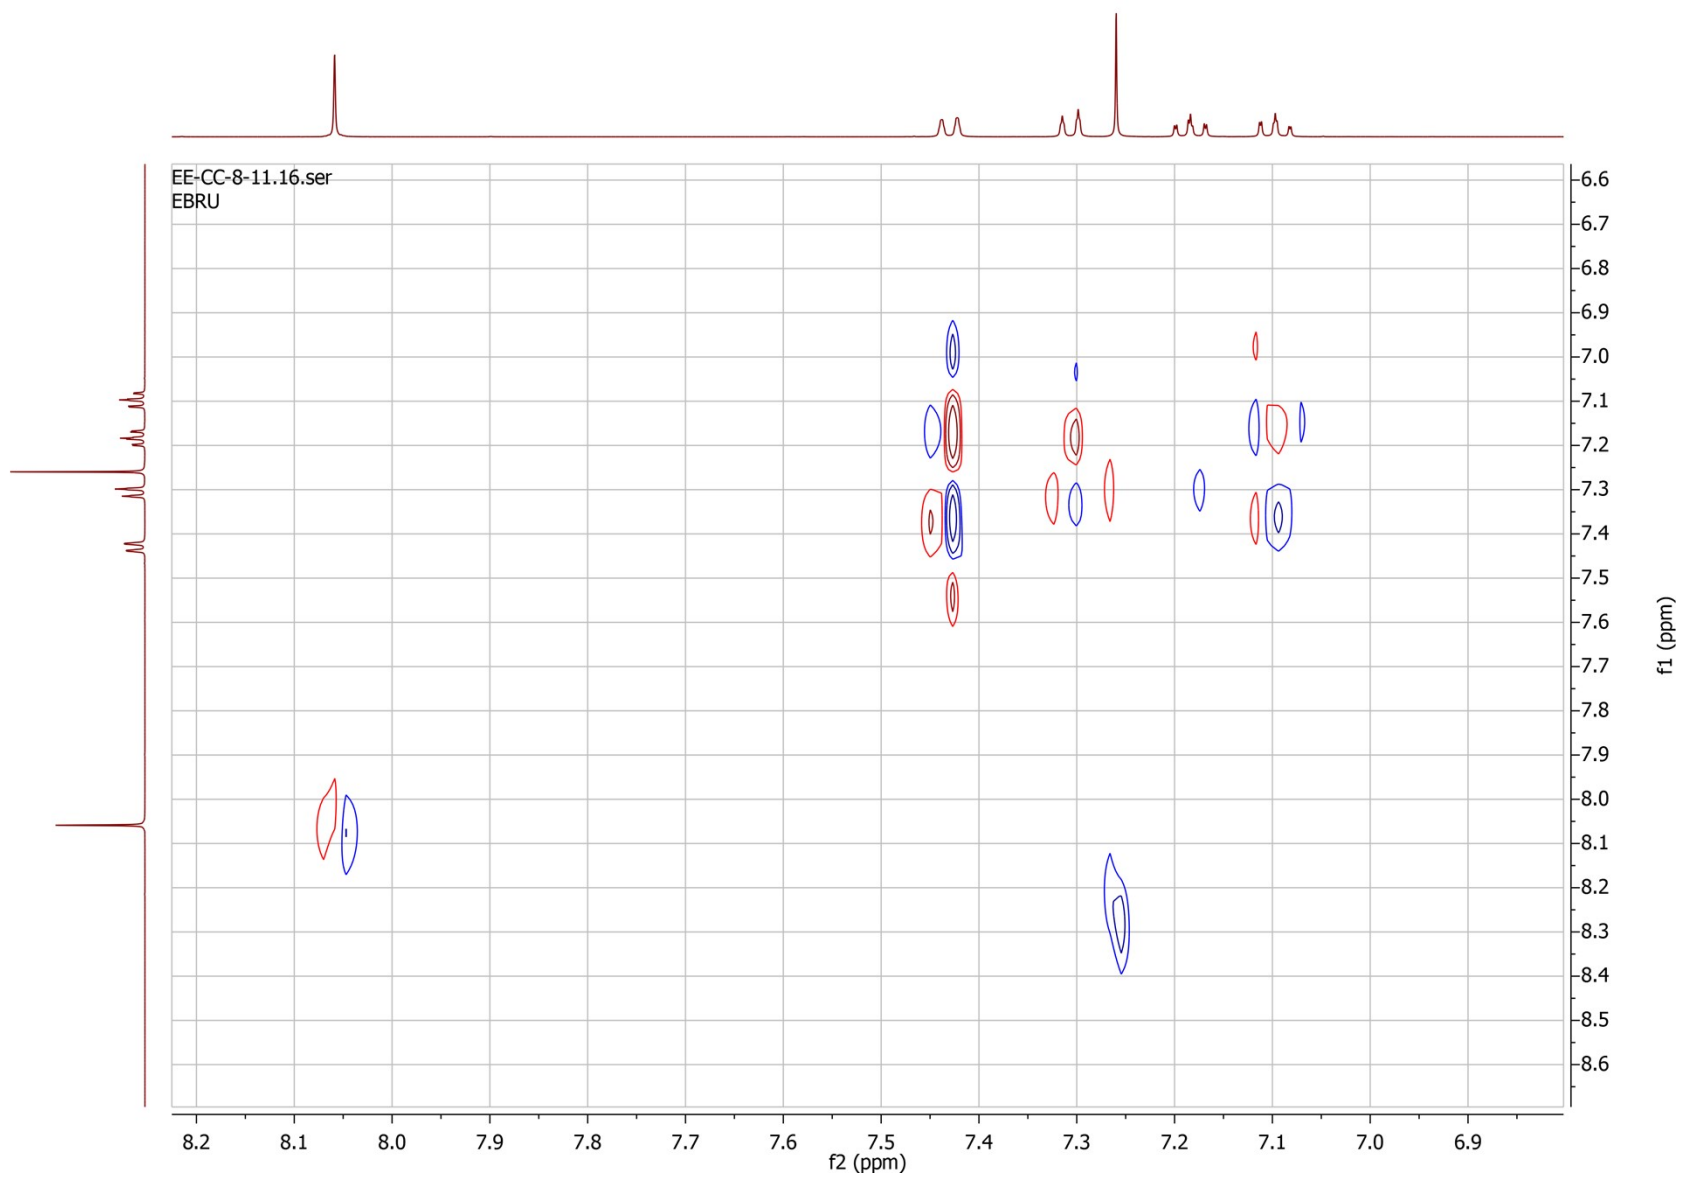

## S7: HRMS of compound 1

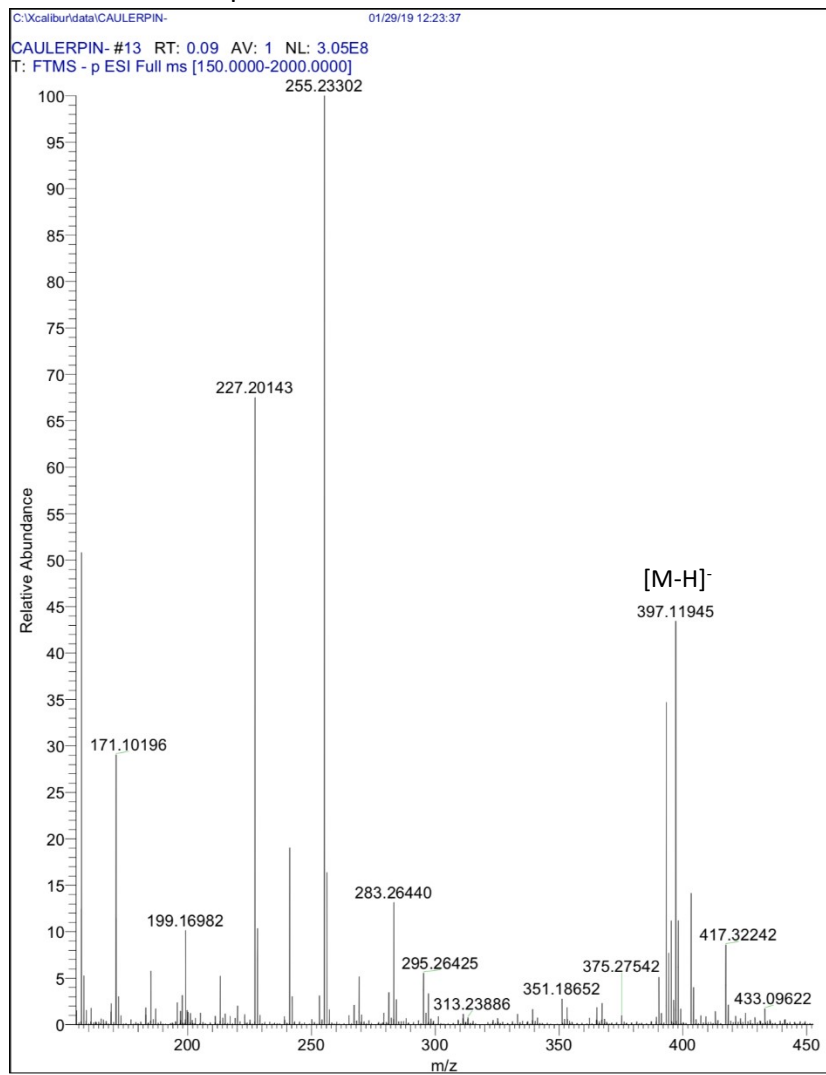



S8: <sup>1</sup>H NMR of compound 2 (500 Hz, MeOD)

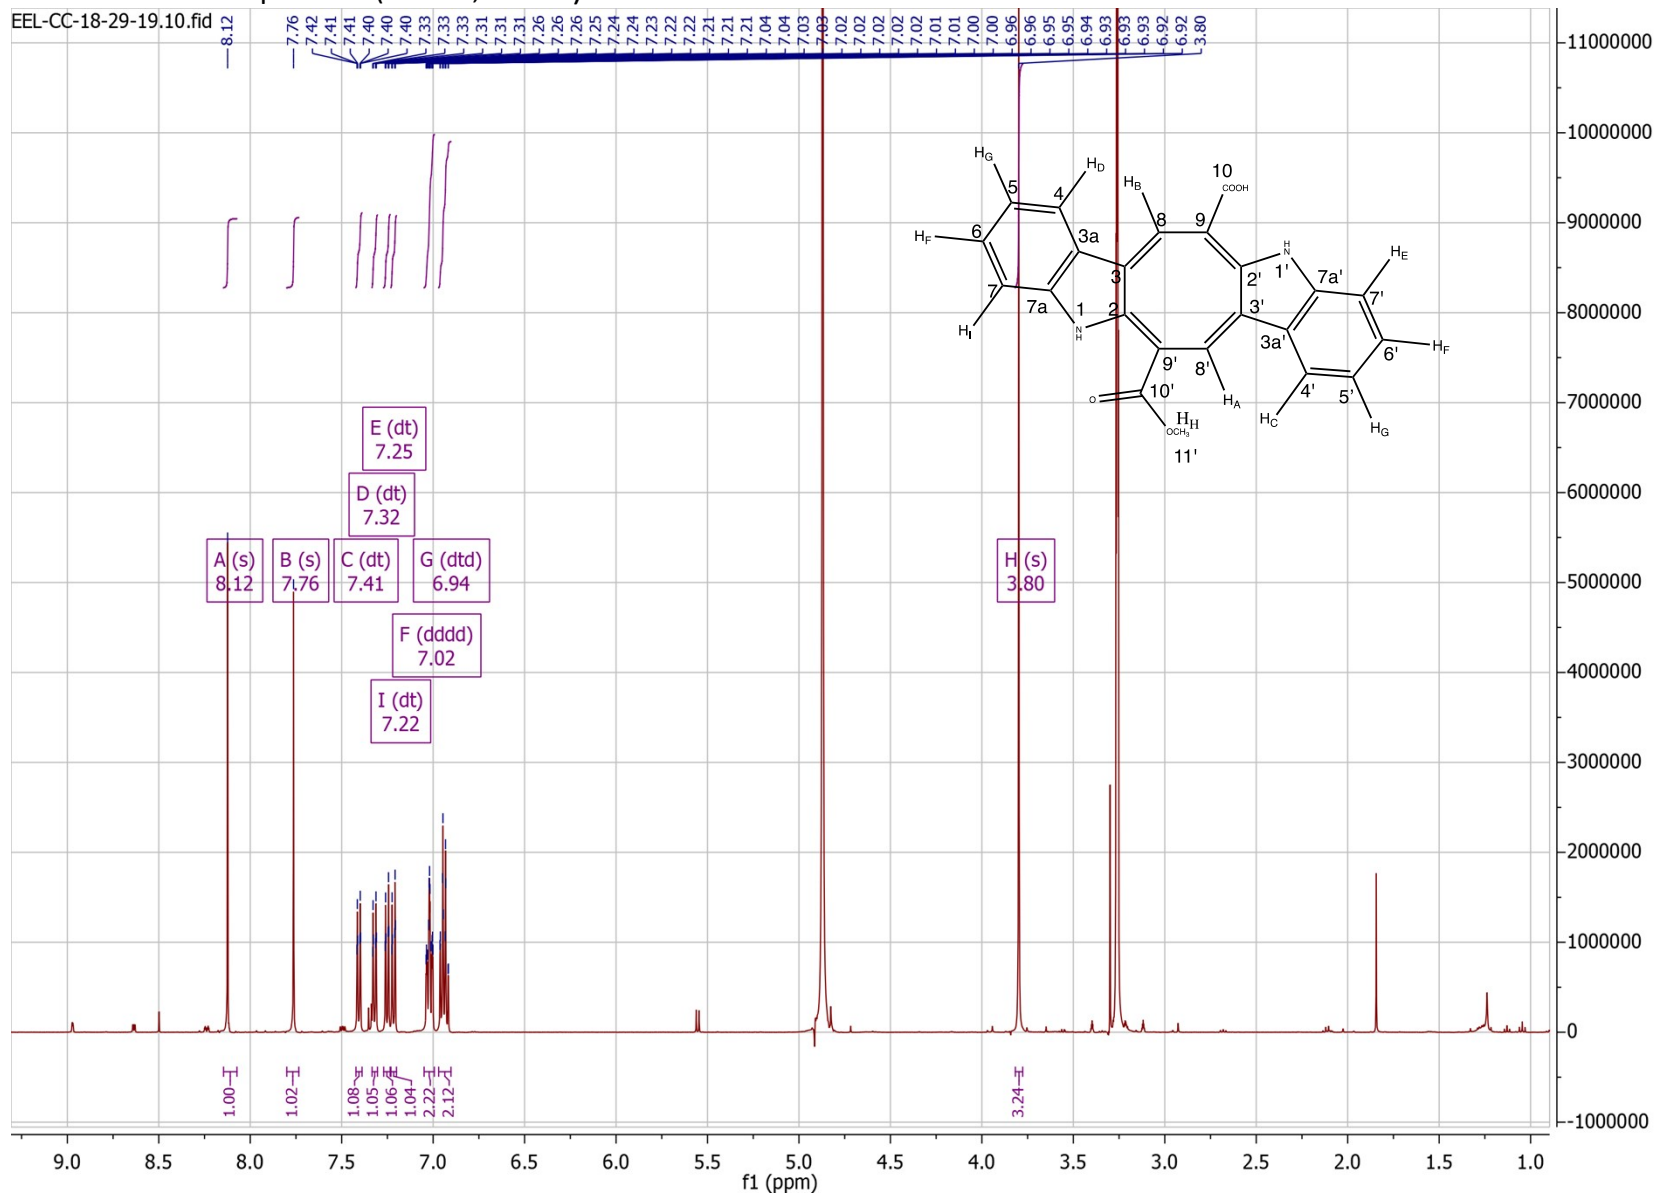

### S9: <sup>1</sup>H NMR of compound 2 zoom in 6.75-8.15 ppm (500 Hz, MeOD)

EEL-CC-18-29-19.10.fid

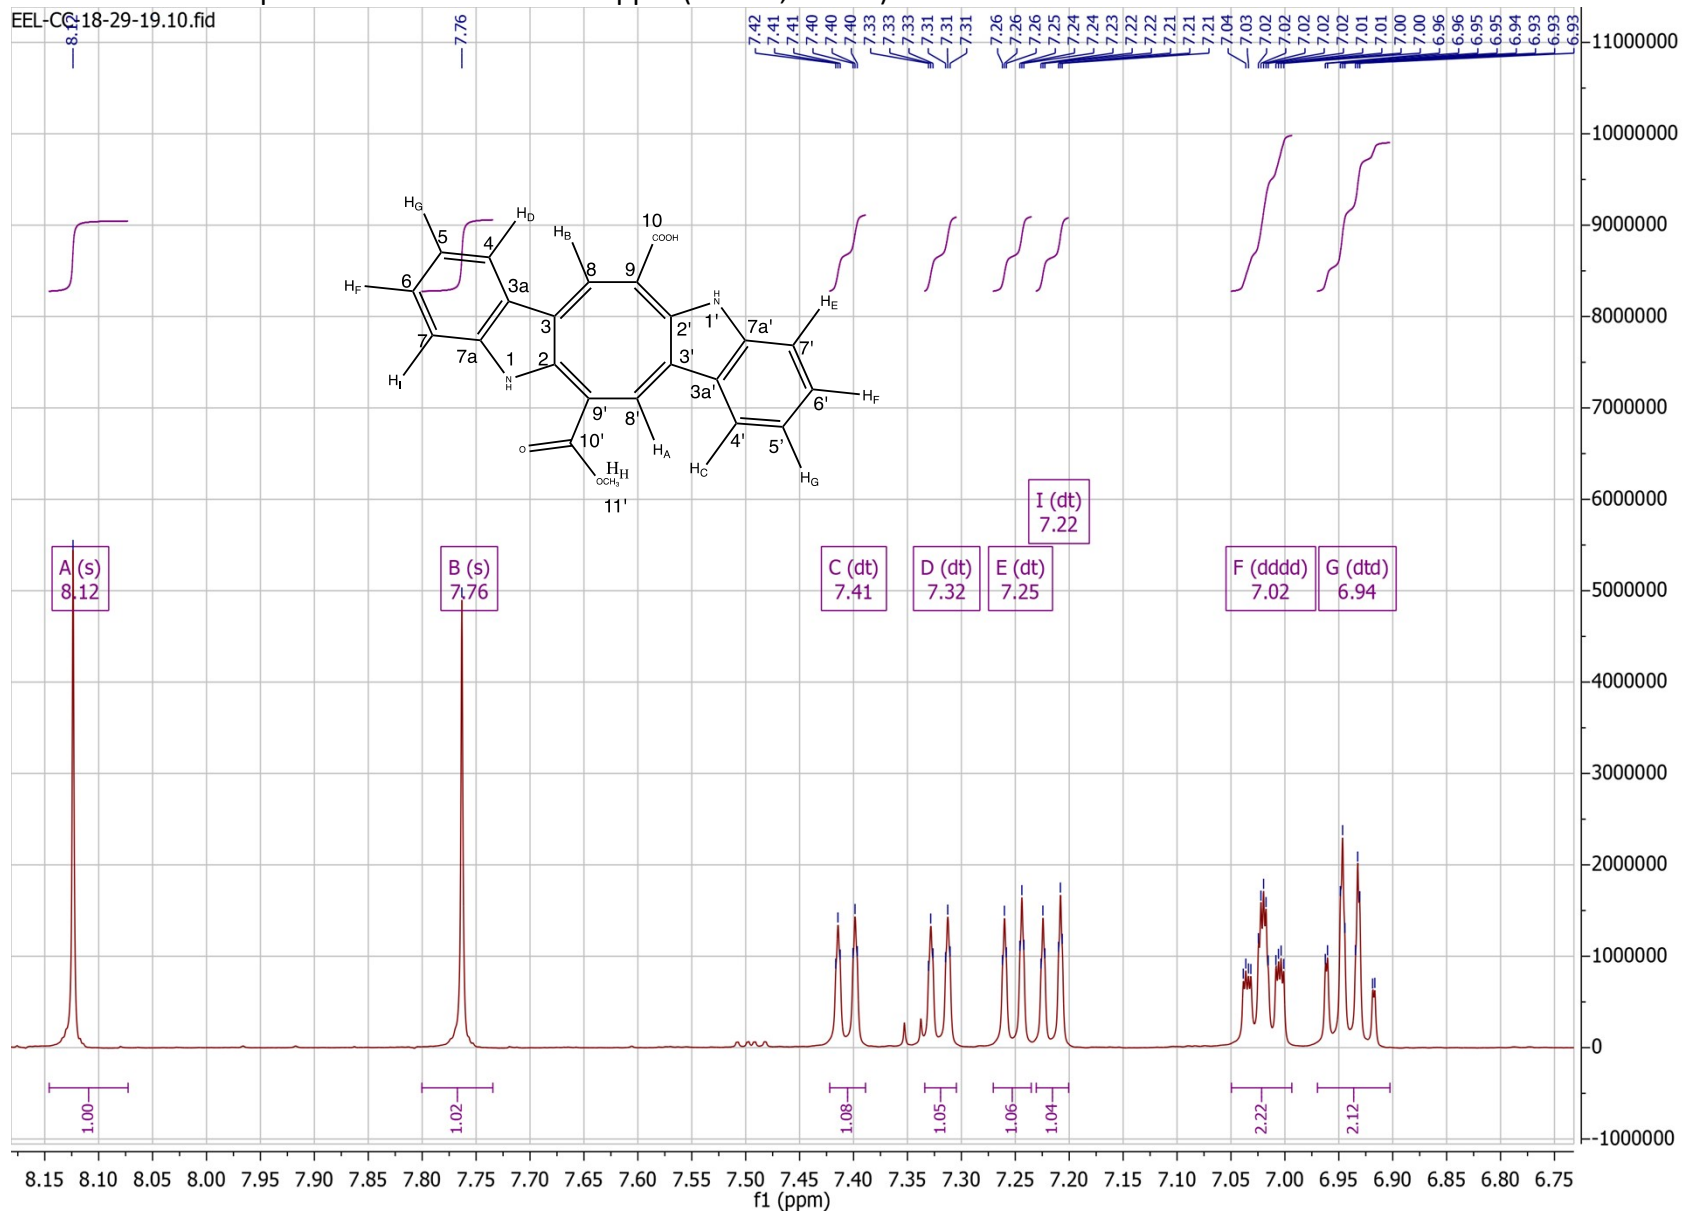



S11: HSQC of compound 2

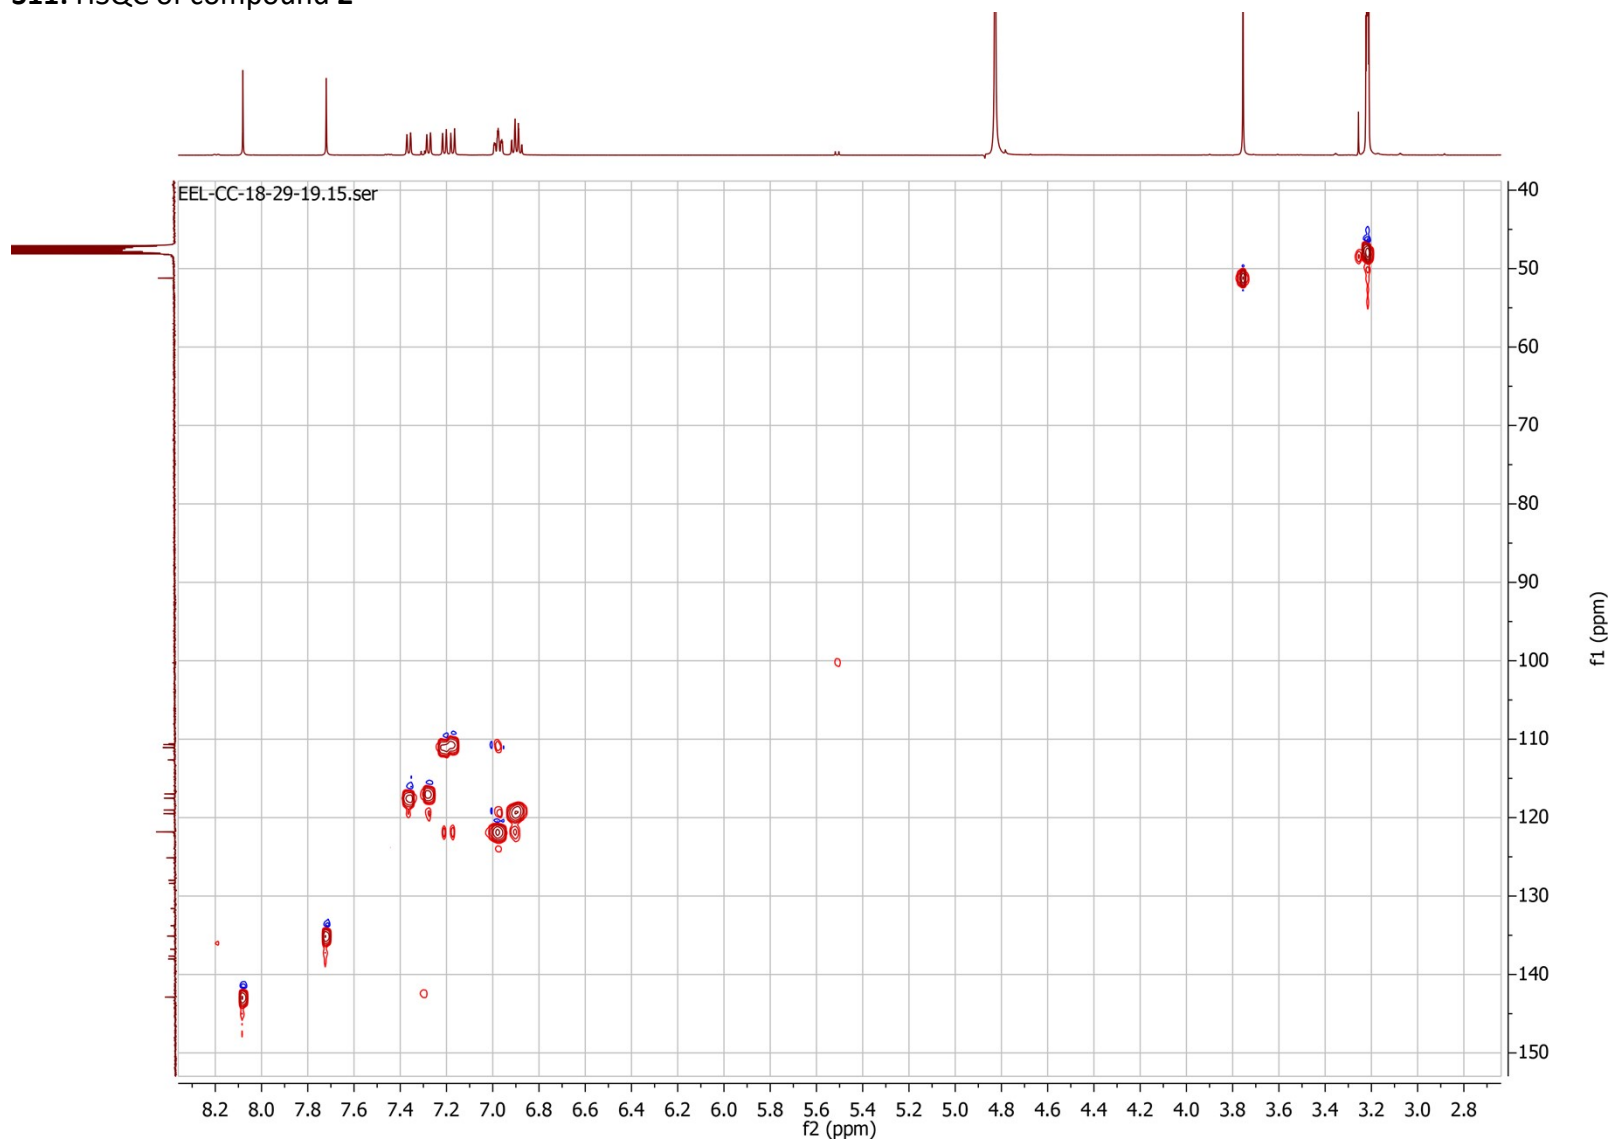

**S12:** HMBC of compound **2** zoom in 6.6-8.4 ppm

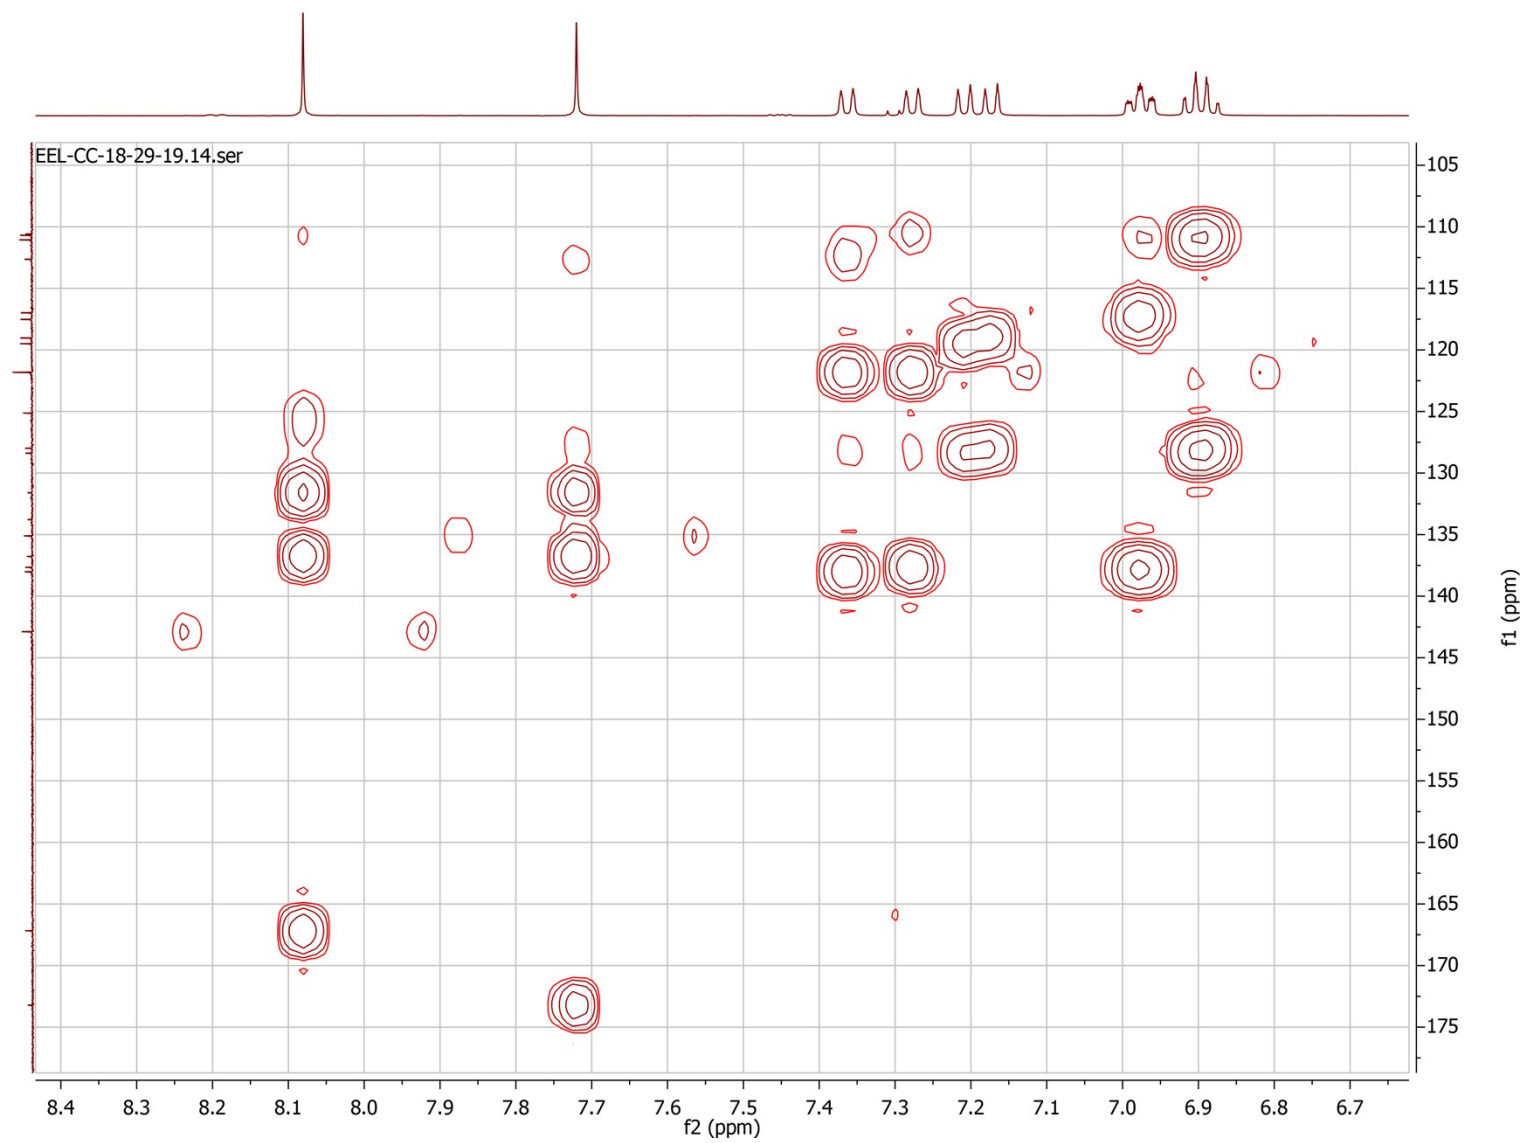

S13: COSY of compound 2

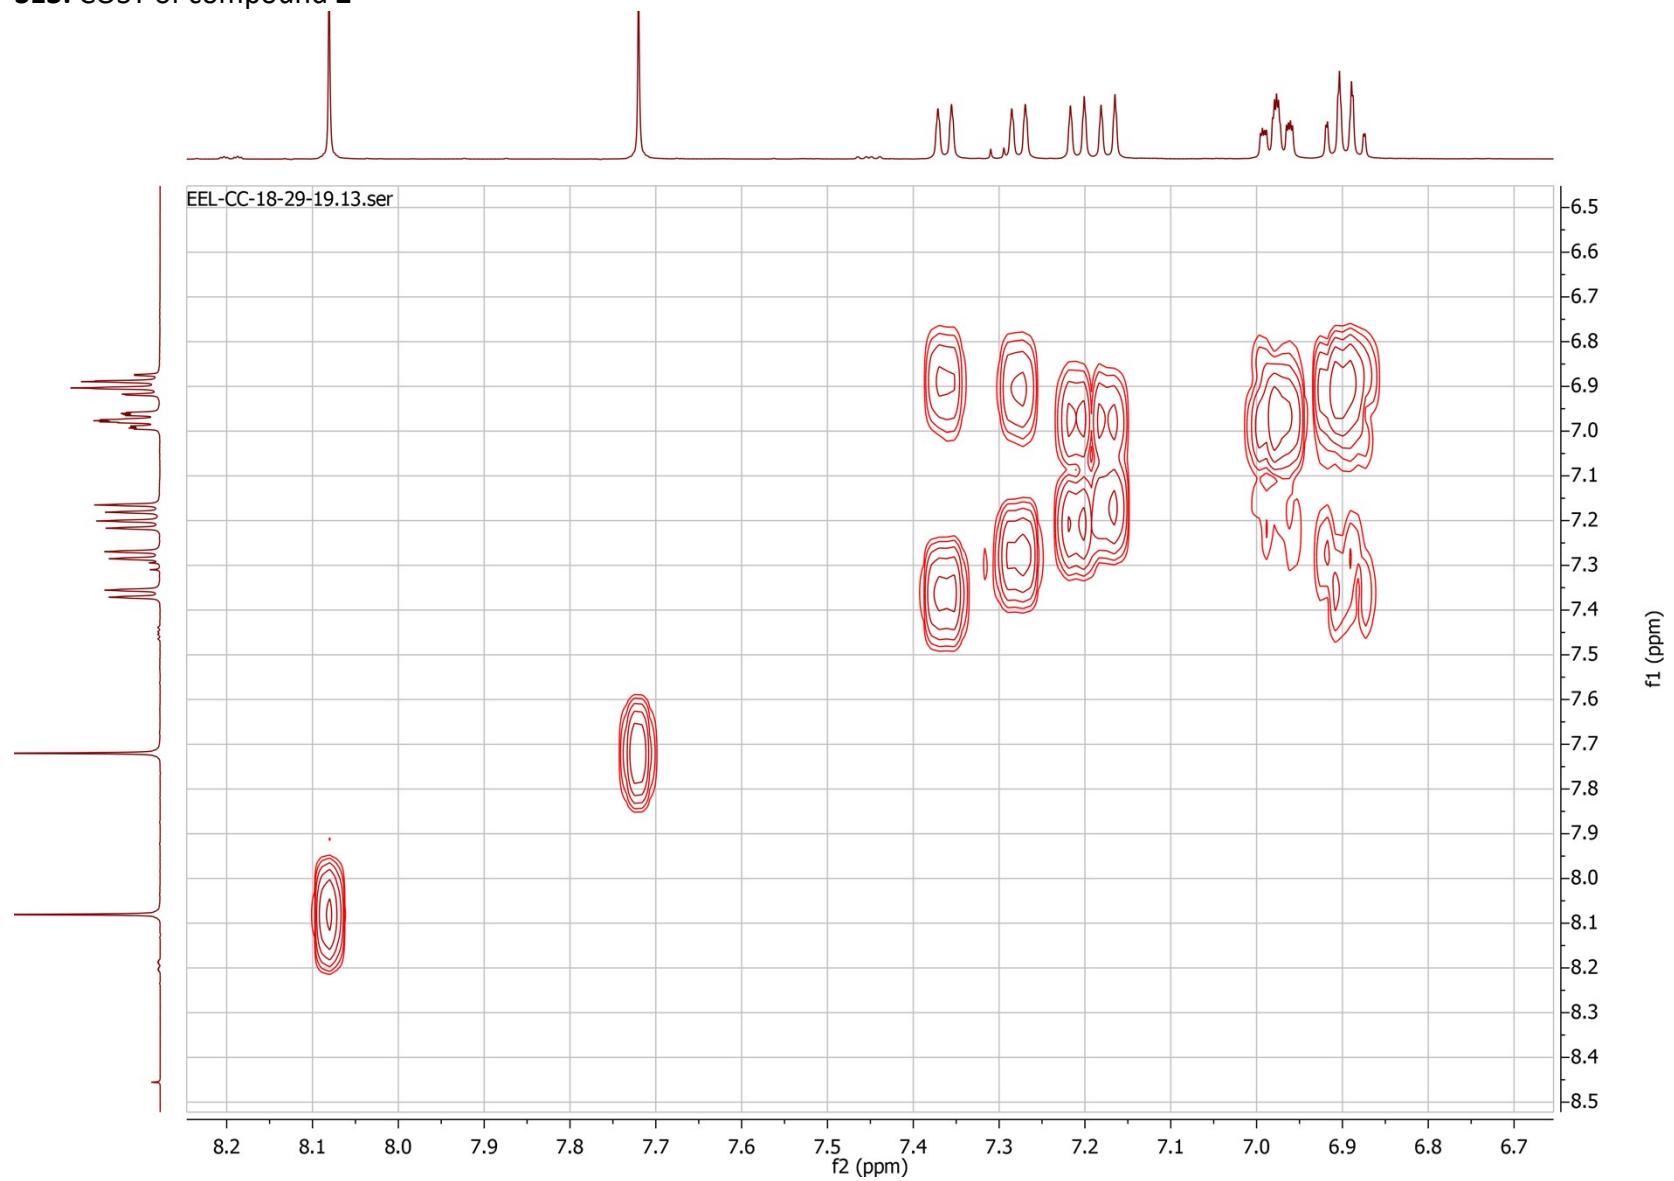

**S14: HRMS of compound 2**

C:\Xcalibur\...EEL-CC-182918-NEG

08/15/22 16:58:31

EEL-CC-182918-NEG #9 RT: 0.06 AV: 1 SM: 7G NL: 3.98E8

T: FTMS - p ESI Full ms [250.0000-500.0000]

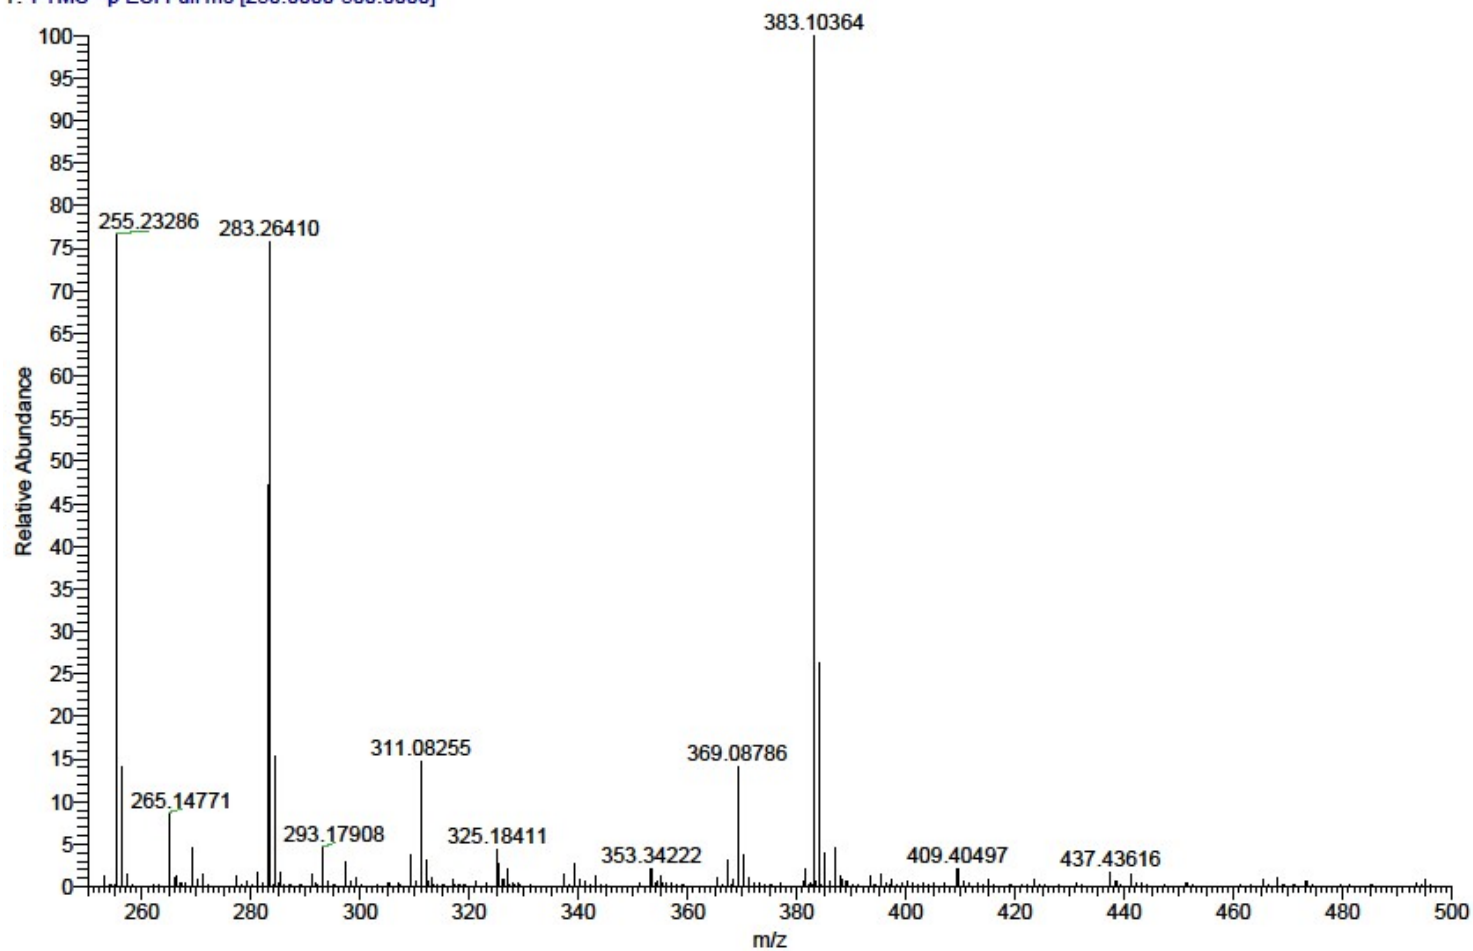

S15:  $^1\text{H}$  NMR of compound **3** (500 Hz,  $\text{CDCl}_3$ )

EEL-CC-7-16M.10.fid

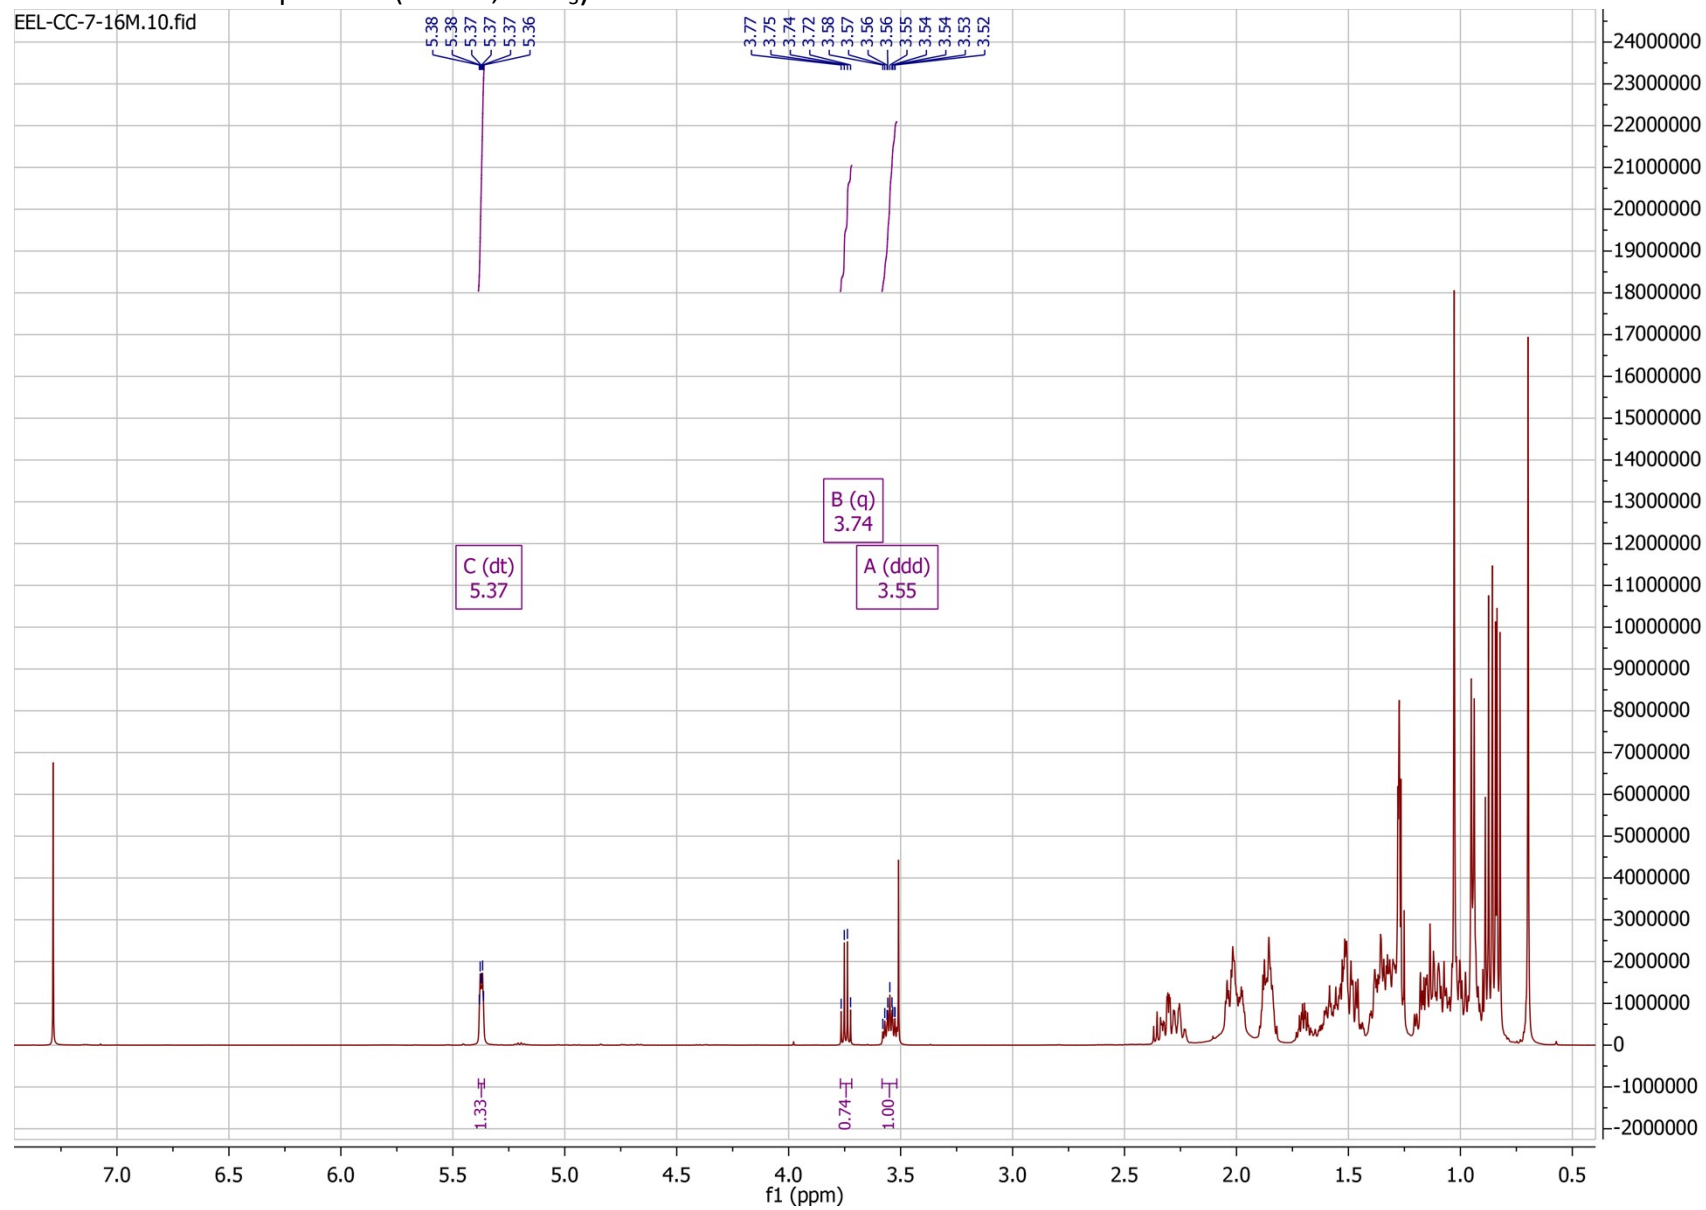



**S16:**  $^{13}\text{C}$  NMR of compound **3** (500 Hz,  $\text{CDCl}_3$ )

EEL-CC-1-16M.10.fid

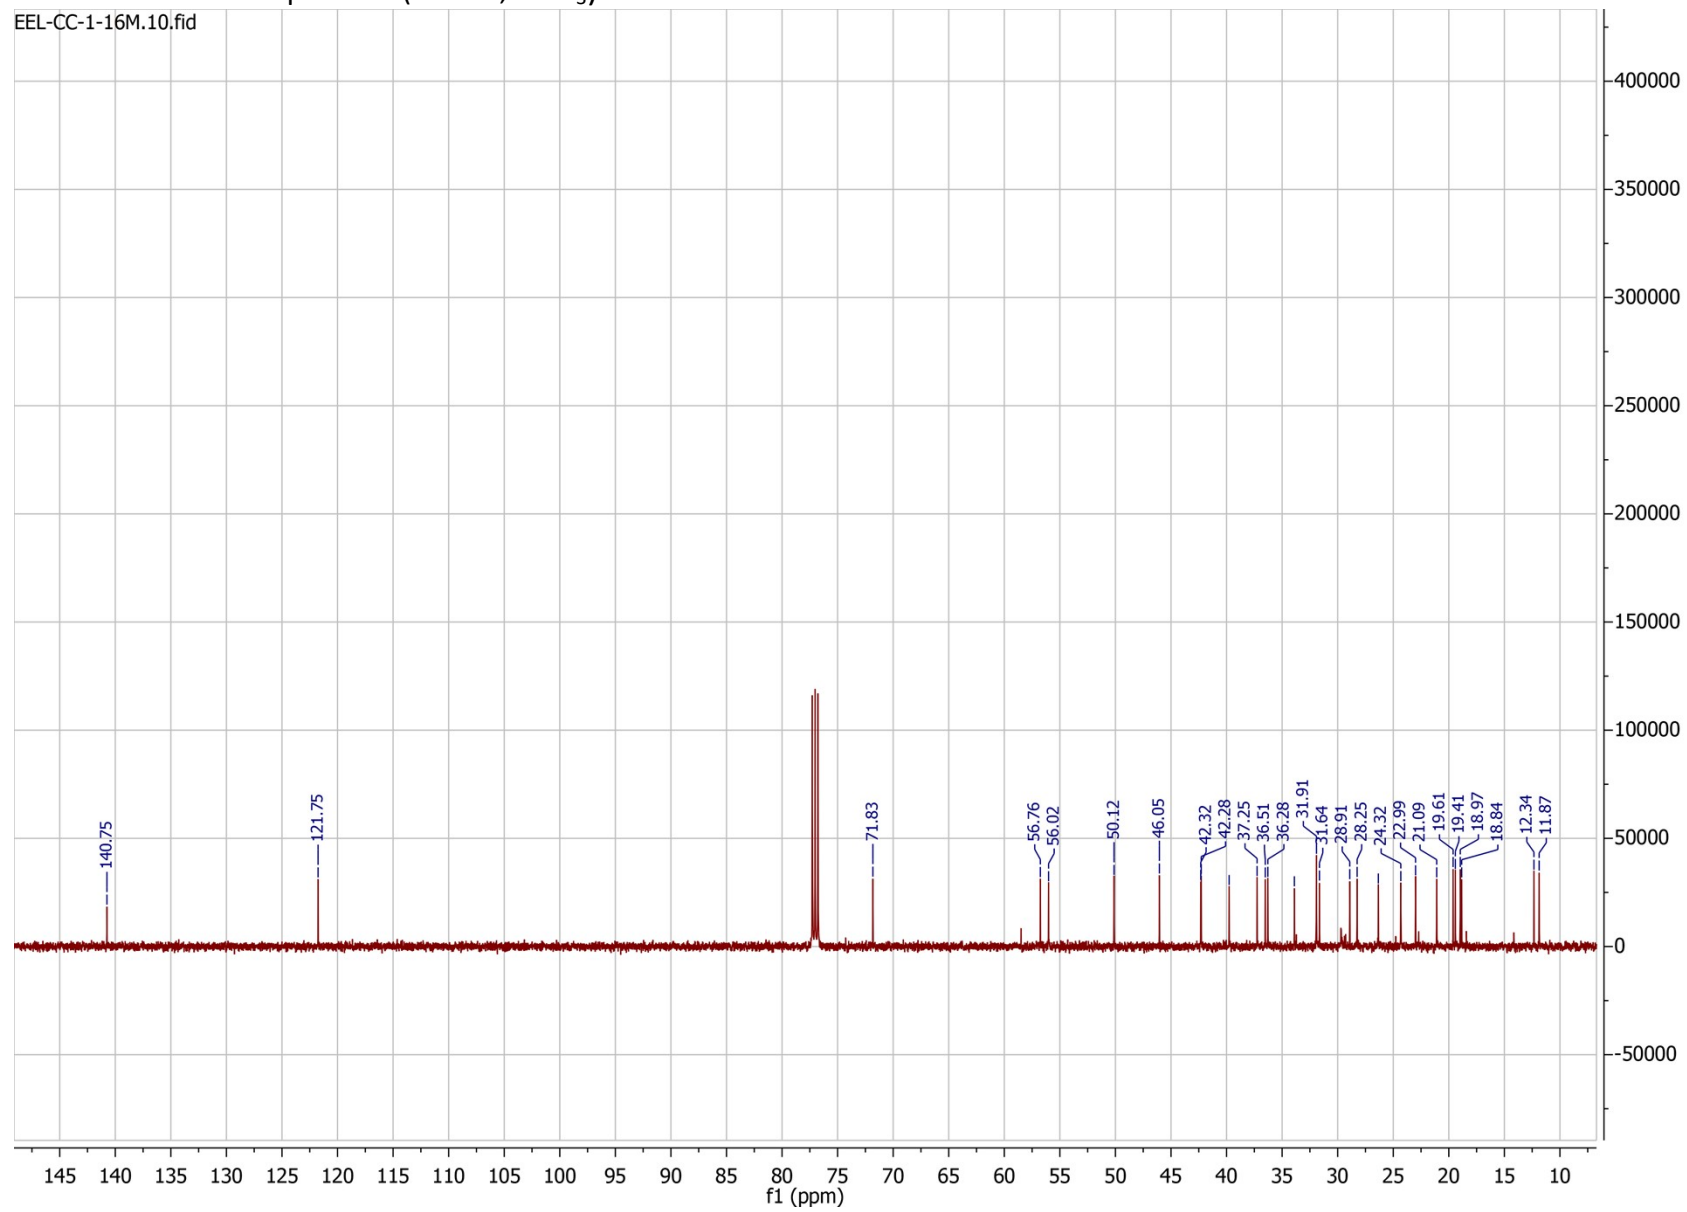

### S17: HRMS of compound 4

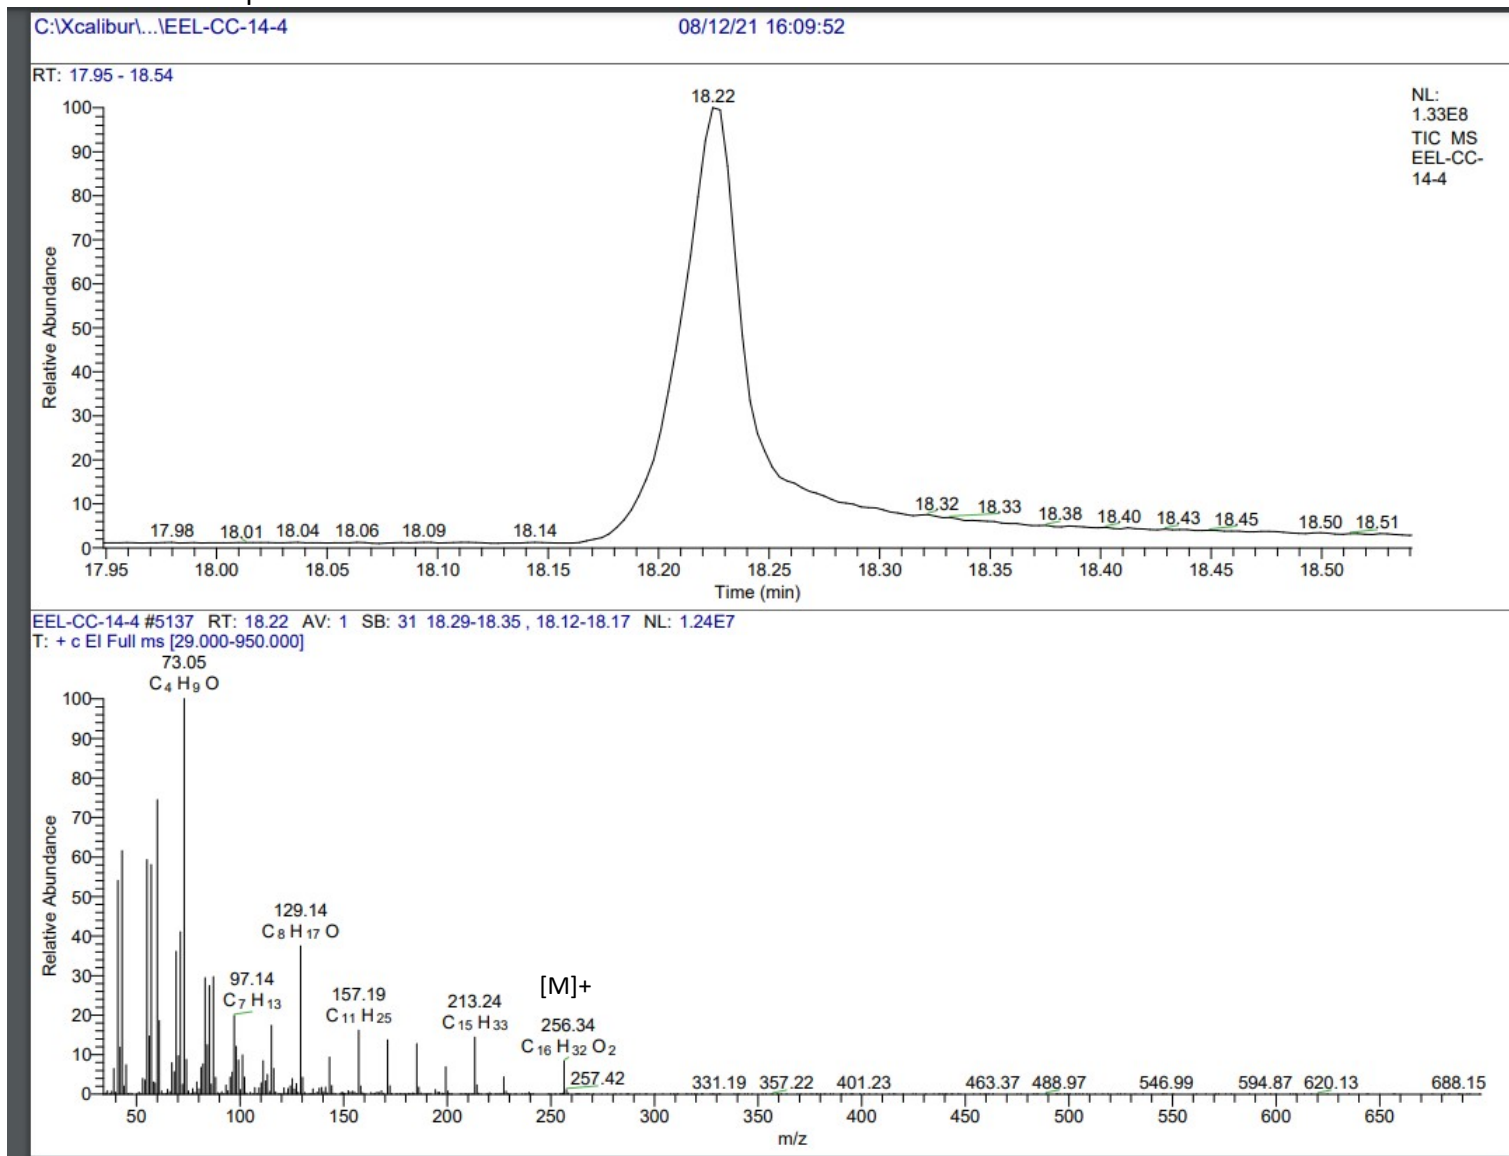

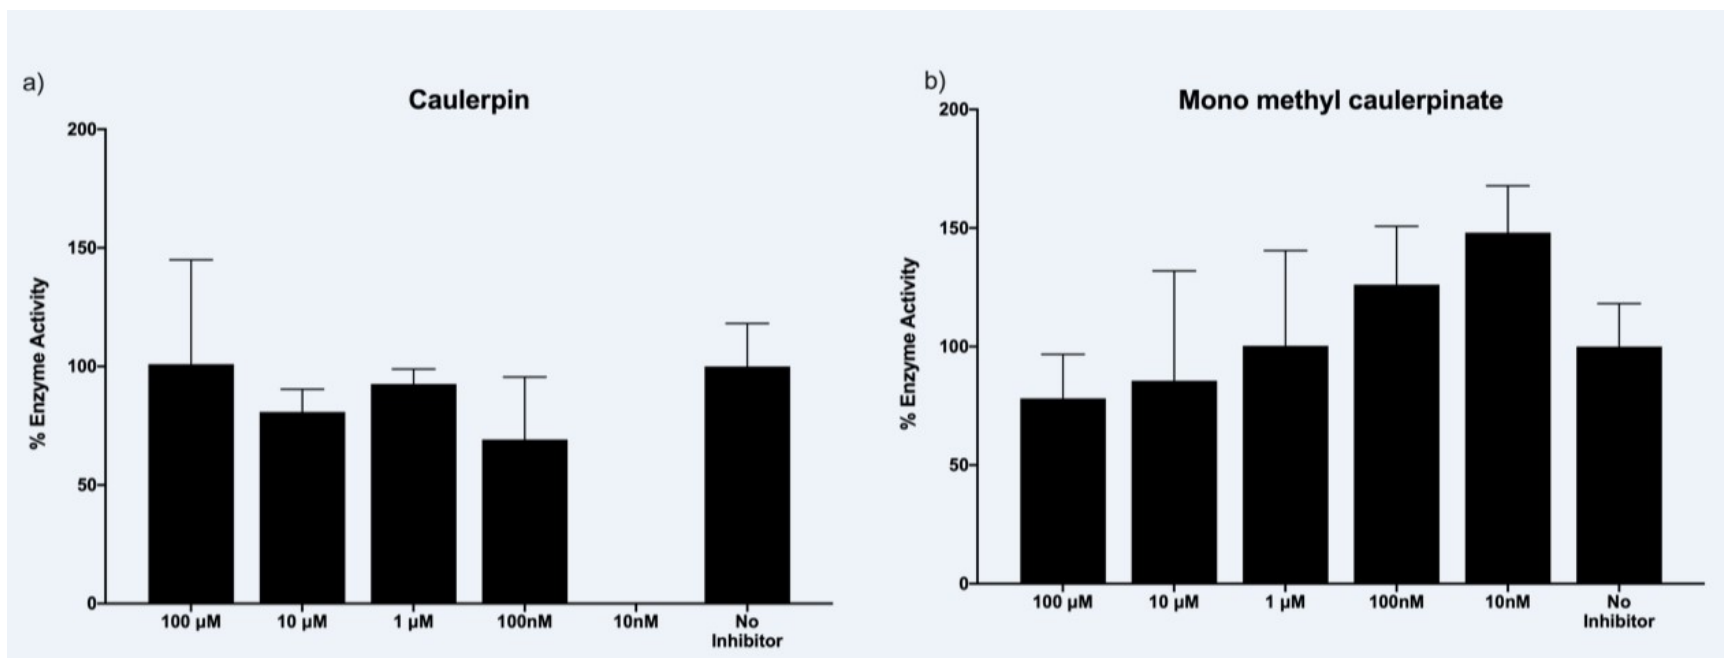

**S18:** Main protease activity of caulerpin (**1**) and mono methyl caulerpinate (**2**) at different concentrations. “No Inhibitor” indicates protease activity without any inhibitor molecules as positive control.

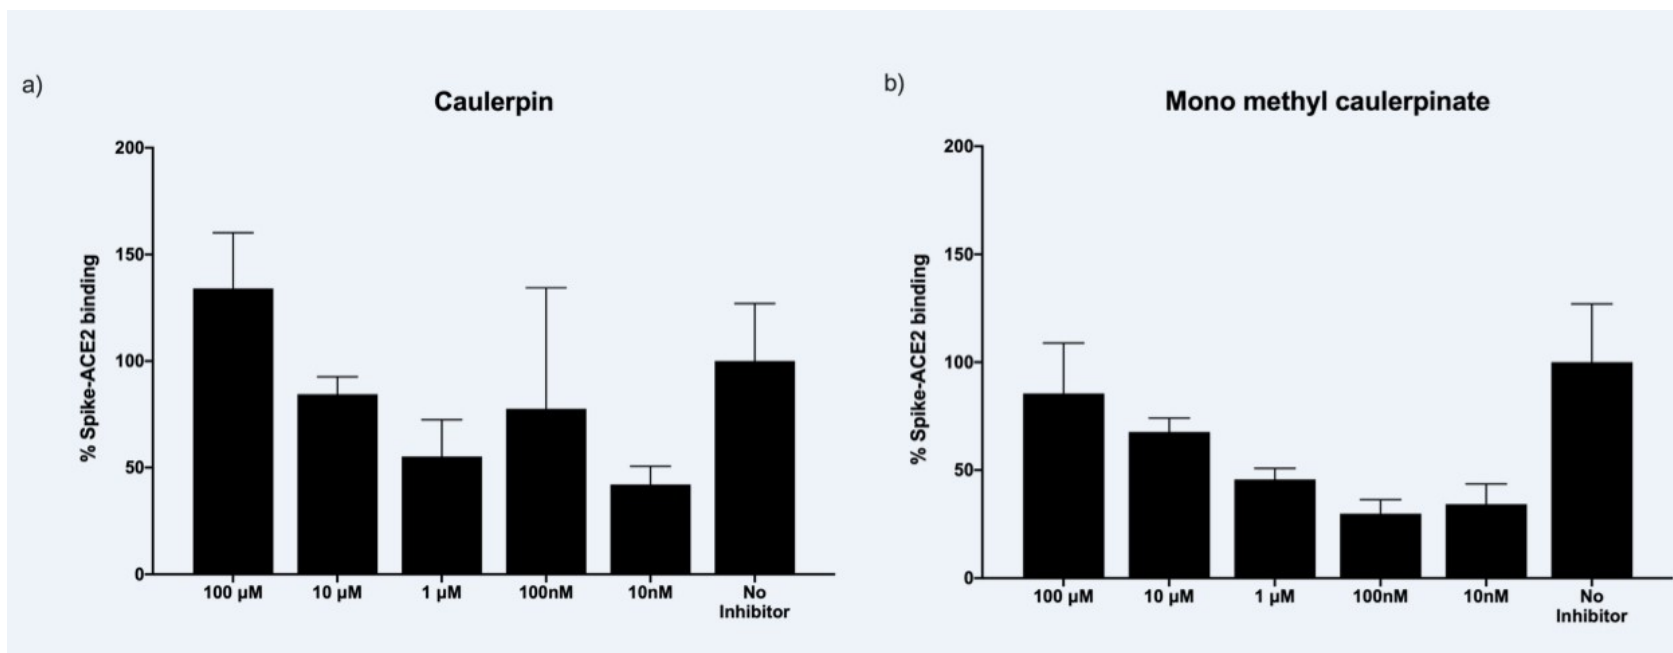

**S19:** Spike and ACE-2 binding activity with of caulerpin (**1**) and mono methyl caulerpinate (**2**) treated at different concentrations “No Inhibitor” indicates the binding activity without any inhibitor molecules as positive control.

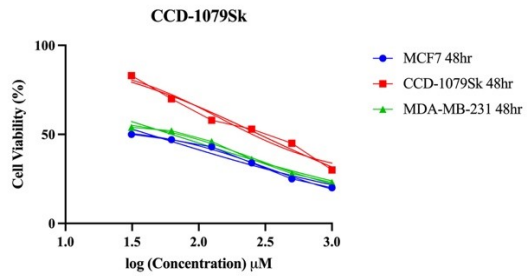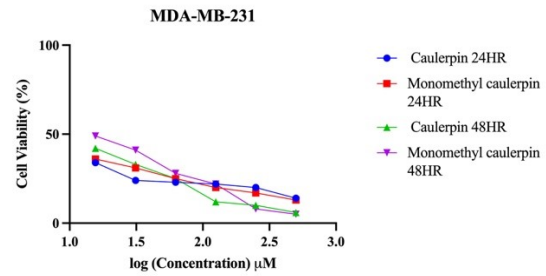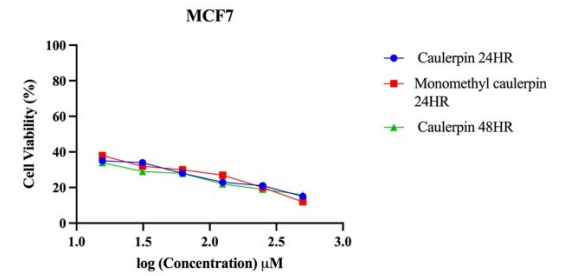

**S20:** Evaluation of the cell viability of the caulerpin and mono methyl caulerpinate against MDA-MB-231 and MCF-7 cancer cell lines by MTT assay.
